# Supplementary material
Source: HighWire-hosted journal article supplement (https://erj.ersjournals.com/content/59/5/2102961)
Supplement: inline-supplementary-material-1 [file inline-supplementary-material-1.pdf]

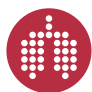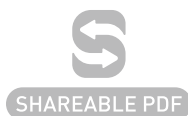

# Sing out for COPD!

Joan B. Soriano <sup>1,2</sup> and Nicholas S. Hopkinson <sup>3</sup>

<sup>1</sup>Servicio de Neumología, Hospital Universitario de la Princesa, Universidad Autónoma de Madrid, Madrid, Spain. <sup>2</sup>Centro de Investigación en Red de Enfermedades Respiratorias (CIBERES), Instituto de Salud Carlos III (ISCIII), Madrid, Spain. <sup>3</sup>National Heart and Lung Institute, Imperial College, London, UK.

Corresponding author: Joan B. Soriano ([jbsoriano2@gmail.com](mailto:jbsoriano2@gmail.com))

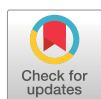

Shareable abstract (@ERSpublications)

**Singing for Lung Health may serve as an activity that can help engage individuals in conventional exercise training. It may have a role as an activity during pulmonary rehabilitation itself, or as a continuation activity afterwards.** <https://bit.ly/3ycwOvB>

**Cite this article as:** Soriano JB, Hopkinson NS. Sing out for COPD! *Eur Respir J* 2022; 59: 2102961 [DOI: 10.1183/13993003.02961-2021].

This single-page version can be shared freely online.

Copyright ©The authors 2022.  
For reproduction rights and  
permissions contact  
[permissions@ersnet.org](mailto:permissions@ersnet.org)

Received: 16 Nov 2021  
Accepted: 2 Dec 2021

The popular Spanish saying “*Quién canta, sus males espanta*”, that is “Singing drives your worries away”, frames a positive attitude that people facing misfortune can hope to cultivate. Although in popular culture singing and music can sometimes be connected with poor or even lethal outcomes, including the legend of Orpheus, The Odyssey’s Sirens, and many Christian Dutch and Flemish genre paintings [1], in other areas, such as opera, a changing perception of the roles of doctors, patients and disease has been reported [2].
